# Supplementary material for: Enhancement of the Bioavailability and Anti-Inflammatory Activity of Glycyrrhetinic Acid via Novel Soluplus®—A Glycyrrhetinic Acid Solid Dispersion
Source: MDPI journal article supplement (doi:10.3390/pharmaceutics14091797), 2022-08-26
Supplement: s1 [file s1]

**Table S1.** Relative proportions of solid dispersion components.

| GA | L-Arg | Soluplus® |
|----|-------|-----------|
| 1  | 0.5   | 1         |
| 1  | 1     | 1         |
| 1  | 2     | 1         |
| 1  | 5     | 1         |
| 1  | 10    | 1         |
| 1  | 1     | 0.5       |
| 1  | 1     | 2         |
| 1  | 1     | 5         |
| 1  | 1     | 10        |
| 1  | 1     | 15        |

Note: Reagent ratios are presented by the mass ratio (w/w/w)

**Table S2.** Grouping and sampling of mice in the ear edema model (n=5).

| Group       | TPA-induced | Gavage drug delivery | Tissue Sampling    |
|-------------|-------------|----------------------|--------------------|
| Control     | -           | PBS                  | Ear, Liver, Kidney |
| TPA group   | +           | PBS                  | Ear                |
| GA group    | +           | GA (20 mg/kg)        | Ear, Liver, Kidney |
| GA-SD group | +           | GA-SD (20 mg/kg)     | Ear, Liver, Kidney |

**Table S3.** Grouping and sampling of mice in ethanol-induced gastric ulcer model (n=5).

| Group       | ethanol-induced | Gavage drug delivery | Tissue Sampling |
|-------------|-----------------|----------------------|-----------------|
| Control     | -               | PBS                  | Stomach         |
| Model group | +               | PBS                  | Stomach         |
| GA group    | +               | GA (20 mg/kg)        | Stomach         |
| GA-SD group | +               | GA-SD (20 mg/kg)     | Stomach         |

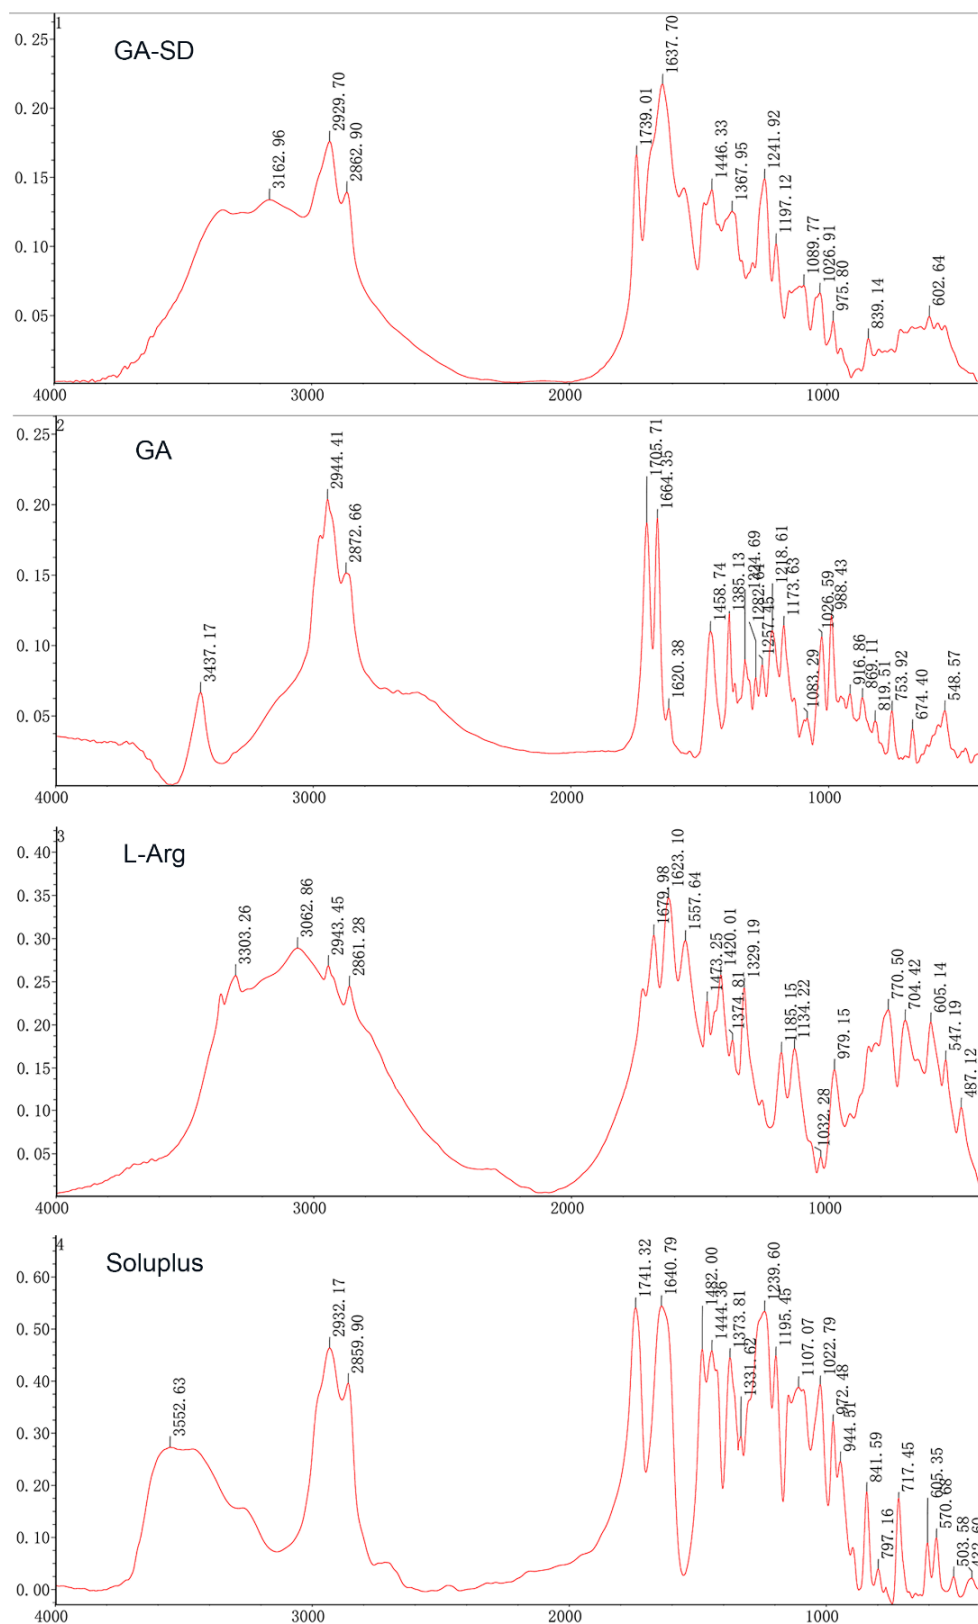

**Figure S1.** FT-IR analysis.

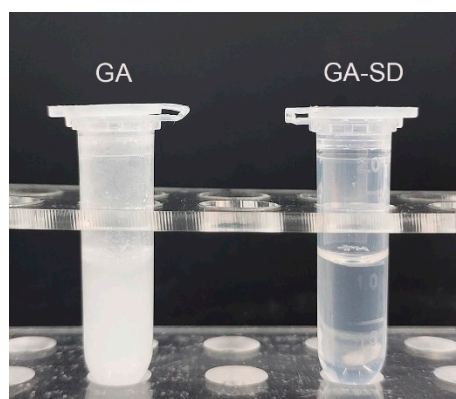

**Figure S2.** Dissolution phenomena for 10 mg GA, GA-SD samples in 1 mL water.

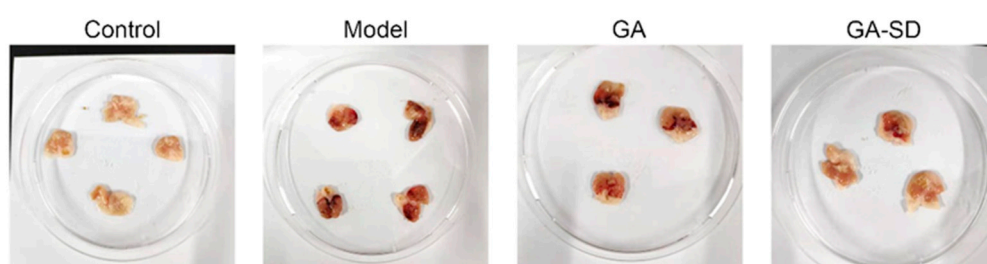

**Figure S3.** Macroscopic appearance of gastric tissues.
